# Supplementary material for: Two-dimensional metal–organic network with an unusual 36 topology and a cubic close packing pattern
Source: Royal Society of Chemistry journal article supplement (doi:10.1039/b801536h), 2008-01-01
Supplement: b801536h.pdf [file b801536h.pdf]

## Supplementary Information

### Two-dimensional metal-organic network with an unusual $3^6$ topology and cubic close packing pattern

Hyunuk Kim<sup>b</sup>, Gyungse Park<sup>a,\*</sup> and Kimoon Kim<sup>b,\*</sup>

<sup>a</sup> Department of Chemistry, Kunsan National University, Kusan 573-701, Republic of Korea.

<sup>b</sup> National Creative Research Initiative Center for Smart Supramolecules and Department of Chemistry, Pohang University of Science and Technology, Pohang 790-784, Republic of Korea.

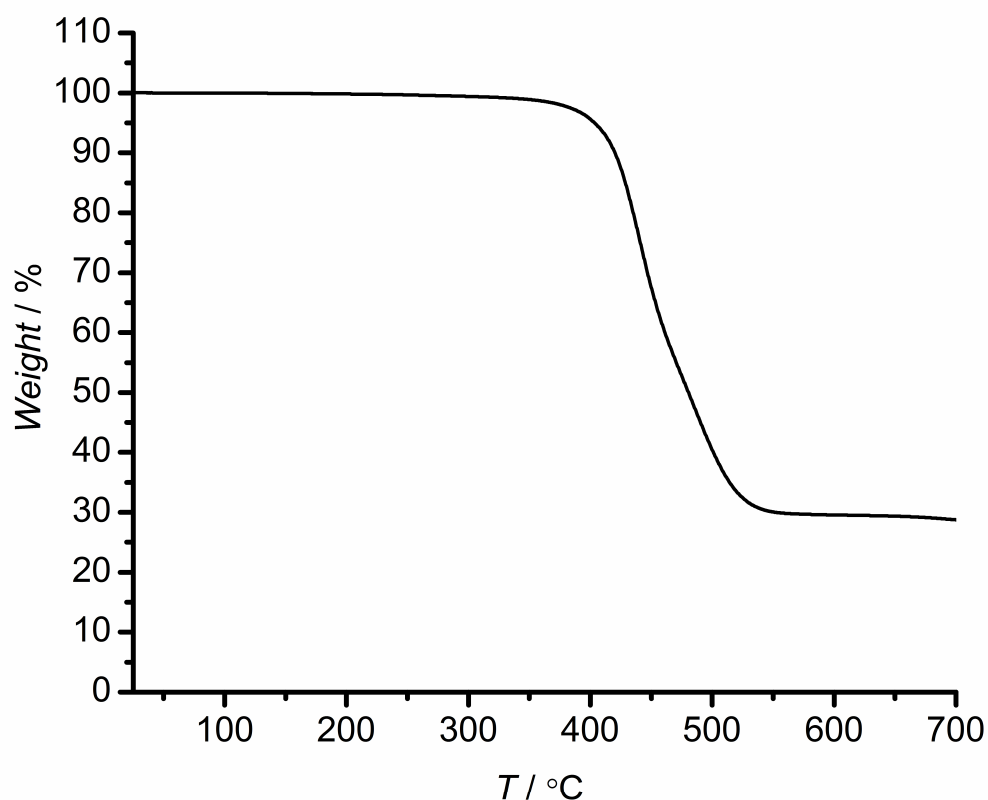

Figure S1. TGA thermogram of 1.

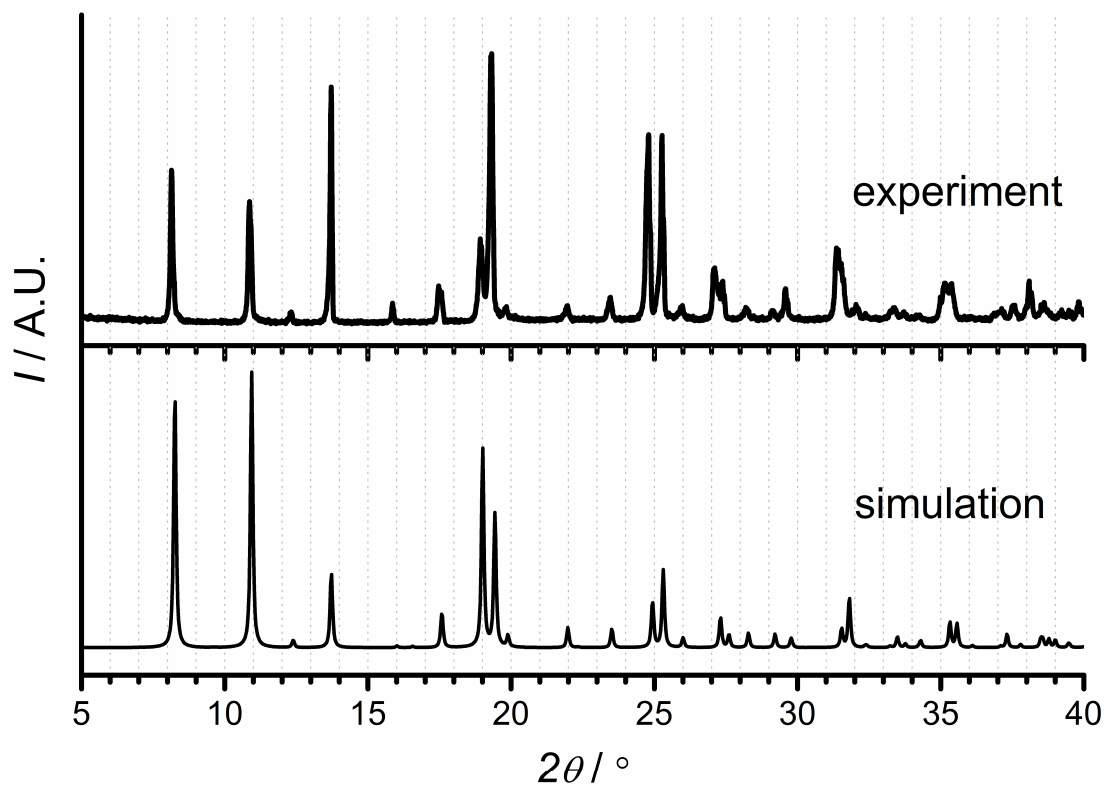

**Figure S2.** X-ray powder diffraction patterns for **1**.
